# Supplementary material
Source: PubMed Central journal article supplement (PMC2651194)
Supplement: NIHMS83645-supplement-01.pdf [file NIHMS83645-supplement-01.pdf]

## Supplemental Data

### COP1 and ELF3 Control Circadian Function and Photoperiodic Flowering by Regulating GI Stability

Jae-Woong Yu, Vicente Rubio, Na-Yeoun Lee, Sulan Bai, Sun-Young Lee, Sang-Sook Kim,  
Lijing Liu, Yiyue Zhang, María Luisa Irigoyen, James A. Sullivan, Yu Zhang, Ilha Lee,  
Qi Xie, Nam-Chon Paek, and Xing Wang Deng

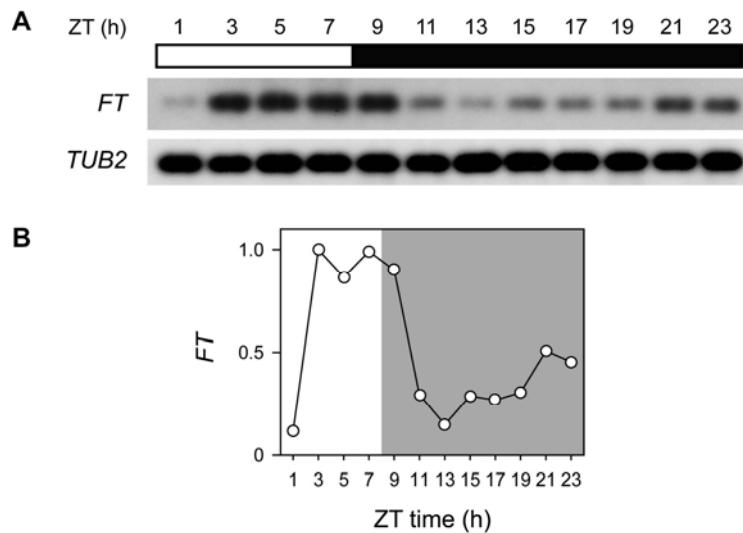

#### Figure S1. Expression Patterns of *FT* Gene in *elf3-8* Mutant under SD Conditions

(A-B) Total RNA samples were collected every 2 hr from 14-d-old plants entrained in SD (8L/16D). *FT* mRNA abundance was quantified by semiquantitative RT-PCR and expressed relative to the abundance of *TUB2* transcripts. In the line graph (B), grey area behind the traces represents the night period. This experiment was repeated twice with similar results.

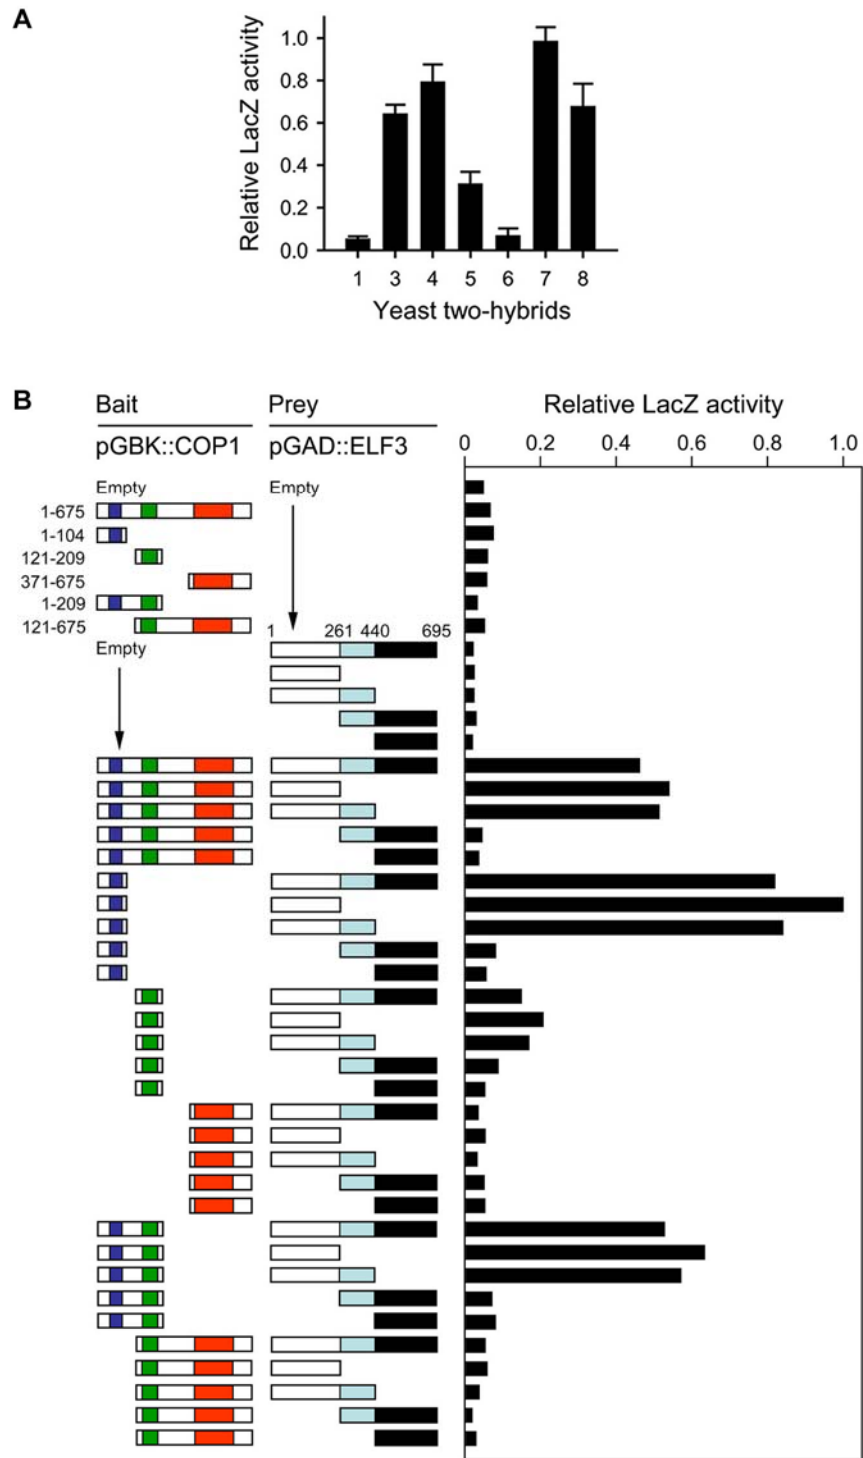

**Figure S2. Relative LacZ Activities of Interactions between COP1 and ELF3 Domains in Yeast Two-hybrid Assays**

(A) Relative LacZ activities in yeast two-hybrid assays shown in Figure 4B. The numbers (1, 3-8) of the x-axis are identical to those in Figure 4B. Activity values are adjusted relative to the highest value among three replicates of COP1::CCT1 (7). Values are the averages of three colonies and error bars represent standard deviations.

(B) Five regions of COP1 (aa 1-675) were used as baits, according to representative COP1 domains; RING-finger (45-94; blue), coiled-coil (128-209; green), and WD-40 repeats (386-619; red), as previously described (McNellis et al., 1994). ELF3 was divided by five parts, such as N-terminal (N; 1-261; white), middle (M; 261-440; cyan), C-terminal (C; 440-695; black), NM (1-440), and MC (261-695) regions as previously described (Liu et al., 2001).

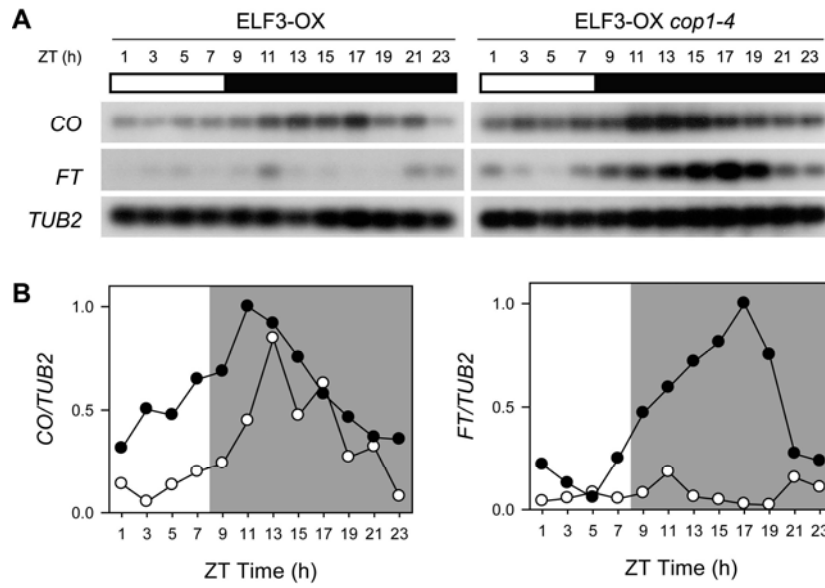

**Figure S3. Expression Patterns of *CO* and *FT* Genes in ELF3-OX and ELF-OX *cop1-4* Plants under SD Conditions**

Total RNA samples were collected every 2 hr from 20-d-old plants entrained in SD (8L/16D). Each mRNA abundance was quantified by semiquantitative RT-PCR and expressed relative to the abundance of *TUBULIN2* (*TUB2*) transcripts. Plants were grown at 22°C under cool-white fluorescent light (100  $\mu\text{mole m}^{-2} \text{s}^{-1}$ ). In the line graphs, grey areas behind the traces represent night periods. Open circle, ELF3-OX; closed circle, ELF3-OX *cop1-4*.

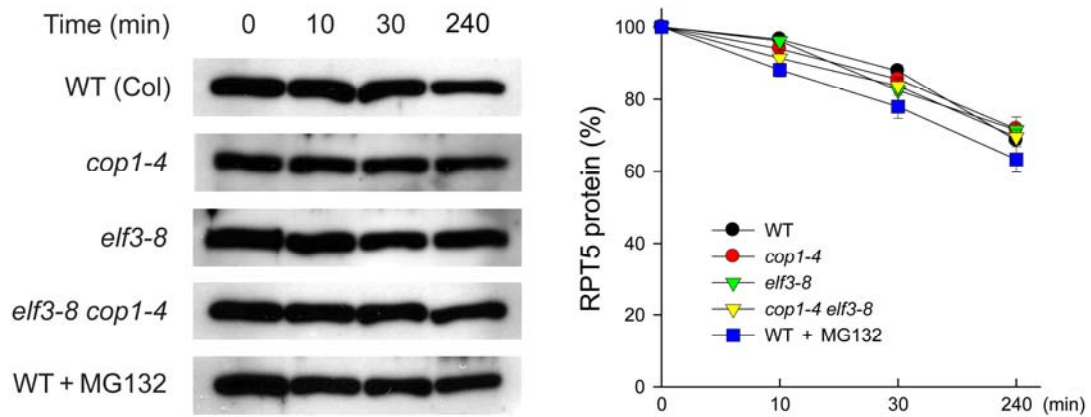

**Figure S4. Mutations in COP1 and ELF3 do not affect the degradation rate of proteasome subunit RPT5.**

Degradation of endogenous RPT5 in cellular extracts from WT (Col), MG132-treated WT (WT+MG132), *cop1-4*, *elf3-8* or *elf3-8 cop1-4* plants grown under LD and harvested at ZT22, after incubation for the indicated times (min). Mean and standard deviation values of three replicates are shown.

**Table S1. Effect of *cop1-4* mutation on flowering time in different mutant backgrounds.**

| Genotype                            | Rosette leaves |            | Days to flowering |            |
|-------------------------------------|----------------|------------|-------------------|------------|
|                                     | LD             | SD         | LD                | SD         |
| Wild type (Col)                     | 11.7 ± 0.8     | 46.9 ± 3.6 | 22.3 ± 0.9        | 52.7 ± 2.3 |
| <i>cop1-4</i>                       | 12.5 ± 0.7     | 12.3 ± 0.9 | 24.8 ± 1.1        | 36.6 ± 1.0 |
| <i>cop1-6</i>                       | 11.2 ± 0.8     | 11.5 ± 0.9 | 23.3 ± 0.9        | 35.7 ± 1.2 |
| DN-COP1                             | 12.3 ± 0.9     | 13.6 ± 1.0 | 23.6 ± 0.5        | 34.2 ± 1.3 |
| <i>phyB-9</i>                       | 9.2 ± 0.5      | 38.1 ± 2.9 | 20.0 ± 0.4        | 48.3 ± 2.1 |
| <i>phyB-9 cop1-4</i>                | 10.5 ± 0.7     | 9.8 ± 1.0  | 21.4 ± 0.8        | 31.7 ± 1.1 |
| <i>cry2-1</i>                       | 27.4 ± 1.3     | 48.3 ± 3.9 | 31.3 ± 1.5        | 53.7 ± 2.5 |
| <i>cry2-1 cop1-4</i>                | 11.5 ± 0.9     | 12.6 ± 0.8 | 24.0 ± 1.3        | 36.7 ± 2.7 |
| <i>elf3-8</i>                       | 7.4 ± 0.5      | 8.1 ± 0.9  | 17.4 ± 0.5        | 30.1 ± 1.2 |
| <i>elf3-8 cop1-4</i>                | 7.9 ± 0.7      | 8.0 ± 0.9  | 18.1 ± 0.6        | 29.7 ± 1.0 |
| <i>gi-1</i>                         | 38.4 ± 2.3     | 52.1 ± 2.7 | 34.7 ± 0.9        | 55.2 ± 2.9 |
| <i>gi-1 cop1-4</i>                  | 37.1 ± 2.0     | 51.2 ± 3.3 | 38.2 ± 1.7        | 57.3 ± 2.9 |
| <i>co-1 COP1_ F<sub>3-1</sub></i>   | 35.2 ± 1.7     | 44.9 ± 2.5 | 34.9 ± 1.3        | 53.6 ± 2.5 |
| <i>co-1 cop1-4 F<sub>3-1</sub></i>  | 26.0 ± 1.7     | 35.7 ± 2.4 | 33.8 ± 1.6        | 45.2 ± 4.3 |
| <i>co-1 COP1_ F<sub>3-2</sub></i>   | 30.6 ± 1.8     | 39.2 ± 2.4 | 32.4 ± 1.7        | 49.7 ± 2.1 |
| <i>co-1 cop1-4 F<sub>3-2</sub></i>  | 21.6 ± 1.9     | 29.1 ± 3.5 | 30.8 ± 1.9        | 41.1 ± 3.7 |
| <i>ft-1</i>                         | 43.6 ± 2.6     | 69.4 ± 4.0 | 40.0 ± 1.4        | 59.1 ± 4.2 |
| <i>ft-1 cop1-4</i>                  | 29.4 ± 1.8     | 36.3 ± 2.8 | 33.6 ± 0.7        | 48.2 ± 2.4 |
| <i>fca-9</i>                        | 63.8 ± 4.3     | >120       | 51.8 ± 3.9        | ND*        |
| <i>fca-9 cop1-4</i>                 | 28.9 ± 2.7     | 26.0 ± 2.6 | 35.0 ± 1.5        | 45.2 ± 2.2 |
| <i>ld-1</i>                         | 57.6 ± 3.2     | >120       | 45.2 ± 3.2        | ND         |
| <i>ld-1 cop1-4</i>                  | 39.1 ± 2.3     | 38.5 ± 3.5 | 41.5 ± 2.5        | 51.3 ± 3.7 |
| <i>FRI-Sf2 COP1_ F<sub>3</sub></i>  | 68.7 ± 3.8     | >120       | 56.8 ± 3.4        | ND         |
| <i>FRI-Sf2 cop1-4 F<sub>3</sub></i> | 36.4 ± 2.2     | 34.6 ± 2.0 | 39.4 ± 2.2        | 49.8 ± 2.7 |
| <i>soc1-1</i>                       | 24.7 ± 1.2     | 60.7 ± 4.3 | 26.7 ± 0.9        | 57.8 ± 4.0 |
| <i>soc1-1 cop1-4</i>                | 20.0 ± 1.2     | 19.5 ± 1.5 | 27.4 ± 0.7        | 37.3 ± 1.3 |
| <i>ft-1 soc1-1</i>                  | 49.7 ± 3.8     | 81.8 ± 6.2 | 41.5 ± 1.1        | 69.1 ± 4.3 |
| <i>ft-1 soc1-1 cop1-4</i>           | 47.4 ± 2.6     | 84.9 ± 5.6 | 43.8 ± 2.1        | 72.8 ± 5.1 |
| <i>spy-3</i>                        | 8.7 ± 0.5      | 34.9 ± 2.5 | 18.8 ± 0.6        | 42.7 ± 1.9 |
| <i>spy-3 cop1-4</i>                 | 7.3 ± 0.8      | 7.6 ± 0.7  | 20.1 ± 0.9        | 30.0 ± 1.1 |

|                       |            |            |    |    |
|-----------------------|------------|------------|----|----|
| Wild type (Col)       | 13.2 ± 0.3 | 48.5 ± 3.4 | ND | ND |
| <i>phyA-KO</i>        | 13.4 ± 0.5 | 52.1 ± 4.3 | ND | ND |
| <i>cop1-4</i>         | 13.1 ± 0.5 | 13.6 ± 0.7 | ND | ND |
| <i>phyA-KO cop1-4</i> | 14.0 ± 1.3 | 20.3 ± 2.1 | ND | ND |

In each genotype, at least 25 plants were analyzed. Due to different ecotypes of *co-1* (Lansberg) and *FRI-Sf* from *cop1-4* (Columbia), segregating F<sub>3</sub> plants were measured. F<sub>3-1</sub> and F<sub>3-2</sub> indicate F<sub>3</sub> progenies produced from two homozygous *co-1* F<sub>2</sub> plants by a cross of *cop1-4* and *co-1* plants, and F<sub>3</sub> indicate those from a homozygous *FRI-Sf* F<sub>2</sub> plant by a cross of *cop1-4* and *FRI-Sf* plants. Flowering time was measured as the number of rosette leaves at bolting. Data represent mean ± standard deviation.

\* ND, not determined.

## Supplemental References

Liu, X.L., Covington, M.F., Fankhauser, C., Chory, J., and Wagner, D.R. (2001). *ELF3* encodes a circadian clock-regulated nuclear protein that functions in an *Arabidopsis PHYB* signal transduction pathway. *Plant Cell* 13, 1293-1304.

McNellis, T.W., von Arnim, A.G., Araki, T., Komeda, Y., Misera, S., and Deng, X.W. (1994). Genetic and molecular analysis of an allelic series of *cop1* mutants suggests functional roles for the multiple protein domains. *Plant Cell* 6, 487–500.
